# Supplementary material
Source: publisher site journal article supplement (https://www.dovepress.com/article/484831)
Supplement: Supplementary file 1 [file get_supplementary_file.php]

**Supplemental Table 1:** Sociodemographic Data for the Commercially Insured Population Initiating Buprenorphine for the Treatment of Opioid Use Disorder

| Sociodemographics |  | Percentage of Population |
| --- | --- | --- |
| Mean Age | | 32.9 |
| Age Group | <18 years | 1.6% |
| 18-24 | 38.7% |
| 25-34 | 19.9% |
| 35-44 | 17.0% |
| 45-54 | 15.4% |
| 55-64 | 7.4% |
| Sex | Male | 62.7% |
| Female | 37.3% |
| U.S. Geographic Region | Northeast | 23.3% |
| Northcentral | 25.7% |
| South | 26.4% |
| West | 23.9% |
| Unknown | 0.7% |
| Urban/Rural Residence | Urban | 86.0% |
| Rural | 13.1% |
| Unknown | 1.0% |
| Pre-Index Comorbid Conditions | Non-opioid drug use disorder | 28.4% |
| Alcohol use disorder | 10.9% |
| Depressive disorder | 29.3% |
| Bipolar disorder | 7.0% |
| Generalized anxiety disorder | 5.8% |
| Schizophrenia | 0.4% |
| Chronic pain condition | 45.4% |
| HIV/AIDS | 0.1% |
| Pre-Index Concomitant Medications | Opioid analgesics | 52.8% |
| Benzodiazepines | 29.2% |
| Non-benzodiazepine sedative hypnotics | 21.6% |
| Antidepressants | 45.6% |
| Antipsychotics | 12.2% |
| Mean Buprenorphine Daily Dose | ≤4mg | 5.1% |
| >4mg to ≤8mg | 19.3% |
| >8mg to ≤12mg | 16.3% |
| >12mg to ≤16mg | 31.2% |
| >16mg to ≤20mg | 11.6% |
| >20mg to ≤24mg | 12.2% |
| >24mg | 4.3% |

Mg: milligrams

*This table has been recreated based upon the demographic information provided in Table 1 of the Ronquest et al.32 study for the commercially insured population initiating buprenorphine for the treatment of opioid use disorder

**Supplemental Table 2:** Sensitivity Analyses Inputs

| Model Parameters | Base Case | Reference | Lower Bound | Reference | Upper Bound | Reference |
| --- | --- | --- | --- | --- | --- | --- |
| Percent Adherent at Baseline | 37.1% | Ronquest32 | 32.1% | Tkacz35 | 48.4% | Liao34 |
| Increase in Patients Adherent due to Blister-Packaging | 13% | Zedler51 | 5% | Zedler51 | 21% | Zedler51 |
| Relapse-Specific Healthcare Resource Utilization | | | | | | |
| Continuous episodic dependence | 2.7% | Ronquest32 | 2.2% | -20% | 3.2% | +20% |
| Inpatient admission, primary diagnosis OUD | 3.8% | Ronquest32 | 5.2% | Liao34 | 3.0% | +20% |
| Detox, any diagnosis opioid use | 4.8% | Ronquest32 | 31.0% | Liao34 | 3.8% | +20% |
| ED visit, any diagnosis opioid use | 3.6% | Ronquest32 | 4.1% | Liao34 | 2.9% | +20% |
| Composite relapse | 11.4% | Ronquest32 | 13.7% | -20% | 9.1% | +20% |
| All-Cause Healthcare Resource Utilization | | | | | | |
| Inpatient admission | 17.9% | Ronquest32 | 21.4% | -20% | 14.8% | Tkacz35 |
| ED visit | 10.0% | Ronquest32 | 25.1% | Tkacz35 | 8.0% | +20% |
| All Cause Healthcare Costs | | | | | | |
| Inpatient Costs | $3,025 | Ronquest32 | $4,871 | Tkacz35 | $2,420 | +20% |
| Outpatient Costs | $10,697 | Ronquest32 | $10,727 | Tkacz35 | $8,267 | Liao34 |
| Pharmacy Costs | $9,446 | Ronquest32 | $9,027 | Tkacz35 | $11,335 | +20% |
| Total Healthcare Costs | $23,351 | Ronquest32 | $28,021 | -20% | $19,651 | Tkacz35 |

Abbreviations: ED, Emergency Department; OUD, opioid use disorder
